# Supplementary material for: MeCorS: Metagenome-enabled error correction of single cell sequencing reads
Source: PubMed Central journal article supplement (PMC4937190; doi:10.1093/bioinformatics/btw144), 2016-03-15
Supplement: supp_btw144_MeCorS_Supplement.pdf [file supp_btw144_MeCorS_Supplement.pdf]

## Supplementary Information

Bremges, A.<sup>1</sup>, Singer, E., Woyke, T. and Sczyrba, A. (2016). MeCorS:  
Metagenome-enabled error correction of single cell sequencing reads.

<sup>1</sup> abremges@cebitec.uni-bielefeld.de

### Availability

MeCorS git repository <https://github.com/metagenomics/MeCorS>

Benchmarking data sets <http://genome.jgi.doe.gov/MeCorS>

### List of Figures

- S1 SAG sequencing coverage profiles 2
- S2 Effect of different coverage thresholds 6
- S3 Efficiency of threading 9

### List of Tables

- S1 Profile of the *in vitro* mock metagenome 3
- S2 Performance of SAG error correction 4
- S3 IDBA-UD assembly results 7
- S4 SPAdes assembly results 8

*E. coli* single amplified genomes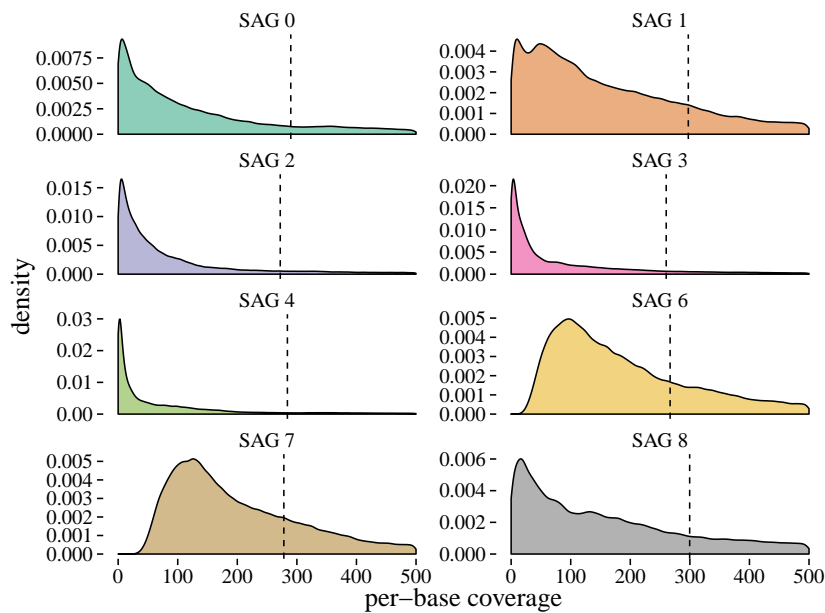

Figure S1: **SAG sequencing coverage profiles.** Density estimations of the per-base coverages, dotted lines represent the SAG's mean coverage.

For benchmarking, we used eight *Escherichia coli* K12-MG1655 single amplified genomes (SAGs) from Clingenpeel *et al.*, 2014<sup>2</sup>:

“Single-cell genomes were obtained as described in Clingenpeel *et al.* (2014)<sup>3</sup>. Reads were subsampled to 315x per genome. Reads were filtered for human contamination by alignment using bwa (Li and Durbin, 2010)<sup>4</sup> and for Illumina artifacts using an in-house tool duk (unpublished).”

While the mean per-base coverage is similar across SAGs, coverage bias introduced by multiple displacement amplification (MDA) results in quite variable profiles (Figure S1). Two SAGs, 6 and 7, show hardly any bias and resemble isolate-grade genomes with a Poisson-like coverage distribution. All other SAGs suffer from considerable MDA bias.

The interquartile range (IQR) of the per-base coverage indicates the variation of coverage across the SAG. Based on the IQR, we propose a “quality” ranking of the eight *E. coli* SAGs:

$$6 \approx 7 > 1 \approx 8 > 0 > 2 > 3 > 4$$

Poorly amplified SAGs benefit the most from error correction with MeCorS (Table S2). The quality of a SAG assembly seems to be negatively correlated with its coverage variation (Tables S3 and S4).

<sup>2</sup> Clingenpeel, S. *et al.* (2014b). Reconstructing each cell's genome within complex microbial communities—dream or reality? *Front Microbiol*, **5**, 771

<sup>3</sup> Clingenpeel, S. *et al.* (2014a). Effects of sample treatments on genome recovery via single-cell genomics. *ISME J*, **8**(12), 2546–2549

<sup>4</sup> Li, H. and Durbin, R. (2010). Fast and accurate long-read alignment with Burrows-Wheeler transform. *Bioinformatics*, **26**(5), 589–595

*In vitro* mock metagenome

| Taxonomy ID   | Phylum                | Species                              | mapped reads  | avg. coverage | est. abundance |
|---------------|-----------------------|--------------------------------------|---------------|---------------|----------------|
| 771875        | Thermotogae           | <i>Fervidobacterium pennivorans</i>  | 39566833      | 2708.24       | 19.39%         |
| 646529        | Firmicutes            | <i>Desulfosporosinus acidophilus</i> | 53202915      | 1579.64       | 11.31%         |
| 526227        | Deinococcus-Thermus   | <i>Meiothermus silvanus</i>          | 32231620      | 1276.02       | 9.14%          |
| 573413        | Spirochaetes          | <i>Spirochaeta smaragdinae</i>       | 39431130      | 1255.97       | 8.99%          |
| 582402        | Proteobacteria        | <i>Hirschia baltica</i>              | 28144226      | 1181.16       | 8.46%          |
| 717605        | Firmicutes            | <i>Thermobacillus composti</i>       | 30954326      | 1046.39       | 7.49%          |
| 767817        | Firmicutes            | <i>Desulfotomaculum gibsoniae</i>    | 24329020      | 741.83        | 5.31%          |
| 767434        | Proteobacteria        | <i>Frateuria aurantia</i>            | 13922996      | 568.16        | 4.07%          |
| 633147        | Actinobacteria        | <i>Olsenella uli</i>                 | 7839526       | 552.99        | 3.96%          |
| 768704        | Firmicutes            | <i>Desulfosporosinus meridiei</i>    | 16066750      | 487.57        | 3.49%          |
| 583355        | Verrucomicrobia       | <i>Coralimargarita akajimensis</i>   | 11810956      | 467.03        | 3.34%          |
| 694430        | Euryarchaeota         | <i>Natronococcus occultus</i>        | 12505736      | 403.70        | 2.89%          |
| 797304        | Euryarchaeota         | <i>Natronobacterium gregoryi</i>     | 8676937       | 335.23        | 2.40%          |
| 797302        | Euryarchaeota         | <i>Halovivax ruber</i>               | 6060380       | 274.95        | 1.97%          |
| 926566        | Acidobacteria         | <i>Terriglobus roseus</i>            | 8464573       | 239.33        | 1.71%          |
| 640132        | Actinobacteria        | <i>Segniliparus rotundus</i>         | 4886507       | 225.63        | 1.62%          |
| 644801        | Proteobacteria        | <i>Pseudomonas stutzeri</i>          | 5448168       | 174.50        | 1.25%          |
| 160490        | Firmicutes            | <i>Streptococcus pyogenes</i>        | 1502208       | 120.44        | 0.86%          |
| 195103        | Firmicutes            | <i>Clostridium perfringens</i>       | 1461840       | 66.55         | 0.48%          |
| 203119        | Firmicutes            | <i>Clostridium thermocellum</i>      | 1542460       | 59.62         | 0.43%          |
| 882884        | Proteobacteria        | <i>Salmonella enterica</i>           | 1831145       | 58.72         | 0.42%          |
| 926556        | Bacteroidetes         | <i>Echinicola vietnamensis</i>       | 2160987       | 57.22         | 0.41%          |
| 196627        | Actinobacteria        | <i>Corynebacterium glutamicum</i>    | 1063668       | 47.67         | 0.34%          |
| <b>511145</b> | <b>Proteobacteria</b> | <b><i>Escherichia coli</i></b>       | <b>647555</b> | <b>20.65</b>  | <b>0.15%</b>   |
| 218493        | Proteobacteria        | <i>Salmonella bongori</i>            | 501312        | 16.61         | 0.12%          |
| 446468        | Actinobacteria        | <i>Nocardiopsis dassonvillei</i>     | 6640          | 0.06          | < 0.01%        |

Table S1: Profile of the *in vitro* mock metagenome. 26 microbial species.

For benchmarking, we used the *in vitro* mock metagenome, including *E. coli* K12-MG1655, from Bowers *et al.*, 2015<sup>5</sup>:

“The mock community is composed of 23 bacterial species and 3 archaeal species. DNA from pure cultures of each of the 26 microbial taxa was extracted with standard genomic purification kits. DNA extracts were quantified in quadruplicate with the Qubit 2.0 fluorometer and pooled at varying ratios to produce a mock community [...] The unamplified control library was prepared from a 200 ng aliquot of the pooled mock community DNA using Illumina’s TruSeq library preparation protocol. [...] All libraries were sequenced on the Illumina HiSeq 2000 platform using 2 x 150 bp paired end sequencing.”

Shotgun metagenome sequencing generated a total of 355,875,608 reads (53 Gbp). We mapped these with BWA-MEM<sup>6</sup>, version 0.7.12, simultaneously against all 26 reference genomes, postprocessed the alignments with samtools<sup>7</sup>, version 1.2, and calculated the per-base coverage values (Table S1).

The relatively low abundance of *E. coli* in the mock community (0.15%) results in a mean coverage of 20.7x, indicating that MeCorS can correct chimeric reads and sequencing errors even when facing only minimal metagenomic coverage (Table S2).

<sup>5</sup> Bowers, R. M. *et al.* (2015). Impact of library preparation protocols and template quantity on the metagenomic reconstruction of a mock microbial community. *BMC Genomics*, **16**(1), 856

<sup>6</sup> Li, H. (2013). Aligning sequence reads, clone sequences and assembly contigs with BWA-MEM. *arXiv:1303.3997*

<sup>7</sup> Li, H. *et al.* (2009). The Sequence Alignment/Map format and SAMtools. *Bioinformatics*, **25**(16), 2078–2079

## SAG error correction

| Metric   | Program     | SAG            |                |                |                |                |                |                |                |
|----------|-------------|----------------|----------------|----------------|----------------|----------------|----------------|----------------|----------------|
|          |             | 0              | 1              | 2              | 3              | 4              | 6              | 7              | 8              |
| Reads    | –           | 9365134        | 9604918        | 8811278        | 8396488        | 9257066        | 8609900        | 8990744        | 9682468        |
| Perfect  | raw         | 2120932        | 2179609        | 1937541        | 1954244        | 1872800        | 2049675        | 2063874        | 2183454        |
|          | BayesHammer | 7656274        | 8260510        | 6302861        | 5970186        | 6297298        | 7639715        | 8068555        | 8317006        |
|          | MeCorS      | <b>8886436</b> | <b>9188854</b> | <b>8440502</b> | <b>7965810</b> | <b>8829995</b> | <b>8264229</b> | <b>8611867</b> | <b>9272559</b> |
| Chimeric | raw         | 69568          | 67625          | 81938          | 75509          | 79443          | 52246          | 44983          | 59265          |
|          | BayesHammer | 72820          | 70590          | 87564          | 80336          | 84813          | 53875          | 46387          | 61948          |
|          | MeCorS      | <b>5502</b>    | <b>4593</b>    | <b>10397</b>   | <b>4648</b>    | <b>5257</b>    | <b>3941</b>    | <b>3824</b>    | <b>4889</b>    |
| Better   | raw         | –              | –              | –              | –              | –              | –              | –              | –              |
|          | BayesHammer | 6743983        | 7026478        | 6156387        | 5669978        | 6574627        | 6244274        | 6645542        | 7095951        |
|          | MeCorS      | <b>7008163</b> | <b>7236195</b> | <b>6707136</b> | <b>6260408</b> | <b>7206731</b> | <b>6403639</b> | <b>6749255</b> | <b>7306961</b> |
| Worse    | raw         | –              | –              | –              | –              | –              | –              | –              | –              |
|          | BayesHammer | 31644          | 26951          | 32315          | 29096          | 41584          | 25270          | 26959          | 28960          |
|          | MeCorS      | <b>25990</b>   | <b>25304</b>   | <b>20560</b>   | <b>27335</b>   | <b>27390</b>   | <b>20791</b>   | <b>21074</b>   | <b>24001</b>   |
| Time (h) | BayesHammer | 1:43           | 1:45           | 1:51           | 2:04           | 2:24           | 1:35           | 1:38           | 1:46           |
|          | MeCorS      | <b>1:13</b>    | <b>1:09</b>    | <b>0:58</b>    | <b>0:53</b>    | <b>1:06</b>    | <b>1:00</b>    | <b>1:08</b>    | <b>1:13</b>    |
| RAM (GB) | BayesHammer | 14.90          | 15.64          | 13.70          | 12.34          | 15.33          | 14.59          | 15.72          | 15.77          |
|          | MeCorS      | <b>10.77</b>   | <b>10.75</b>   | <b>10.76</b>   | <b>9.65</b>    | <b>10.76</b>   | <b>10.79</b>   | <b>10.75</b>   | <b>10.75</b>   |

Table S2: Performance of SAG error correction. Time/RAM for 16 threads.

We corrected the raw reads with BayesHammer<sup>8</sup>, bundled with SPAdes<sup>9</sup>, version 3.6.0. We disabled quality trimming in SPAdes’s configs/hammer/config.info.template by zeroing input\_trim\_quality to perform only error correction.

We ran BayesHammer using SPAdes’s wrapper script:

```
for f in Eco*.fastq.1.gz; do
    spades.py --sc --only-error-correction -1 $f -2 ${f/.1/.2} \
    -o hammer_${f%.fastq.1.gz}
done
```

We also corrected the raw sequencing reads with MeCORS:

```
MG=/path/to/metagenome.fastq
for f in Eco*.fastq.?.gz; do
    mecors -s $f -m $MG | gzip -1 > ${f/.fastq./.mecors.fastq}
done
```

We evaluated the performance of read error correction as described in Li, 2015<sup>10</sup>, using the same read-based metrics:

“A read is said to become *better* (or *worse*) if the best alignment of the corrected sequence has more (or fewer) identical bases to the reference genome than the best alignment of the original sequence. The table gives [...] the number of reads mapped *perfectly*, number of *chimeric* reads (i.e. reads with parts mapped to different places), number of corrected reads becoming *better* and the number of corrected reads becoming *worse* than the original reads.”

<sup>8</sup> Nikolenko, S. I. *et al.* (2013).

BayesHammer: Bayesian clustering for error correction in single-cell sequencing. *BMC Genomics*, **14** Suppl 1, S7

<sup>9</sup> Bankevich, A. *et al.* (2012). SPAdes: a new genome assembly algorithm and its applications to single-cell sequencing. *J. Comput. Biol.*, **19**(5), 455–477

<sup>10</sup> Li, H. (2015). BFC: correcting Illumina sequencing errors. *Bioinformatics*, **31**(17), 2885–2887

We note that MeCorS only implicitly corrects chimeric SAG reads, yet reduces the amount of chimeras by one order of magnitude. MDA introduces chimeric junctions roughly once per 10 kbp in SAGs<sup>11</sup>, but metagenome sequencing is largely unbiased and free of chimeras.

Chimeric reads contain DNA sequences originating from two different genome regions, say *A* and *B*, with the first part originating from region *A*, the second part from region *B*. A chimeric junction will (in most cases) result in an untrusted 32nd base (from region *B*) when looking at its 31-mer prefix (from region *A*; phase 3 of MeCorS). MeCorS then tries to correct this position of the SAG read by replacing the untrusted 32nd base (*B*) with the most frequent and trusted 32nd base from the metagenome (*A*). MeCorS therefore performs an implicit and thorough write-through correction of chimeric SAG reads, completely rewriting their second parts.

<sup>11</sup> Lasken, R. S. and Stockwell, T. B. (2007). Mechanism of chimera formation during the Multiple Displacement Amplification reaction. *BMC Biotechnol.*, 7, 19

## Fine-tuning MeCorS

We recommend running MeCorS with default settings. They work sufficiently well for most SAG/metagenome combinations.

### Metagenome coverage threshold

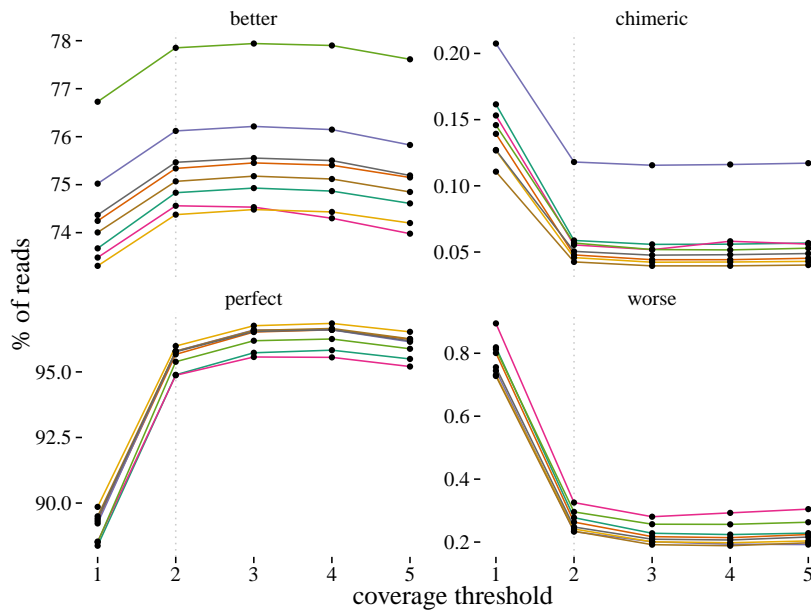

Figure S2: **Effect of different coverage thresholds.** MeCorS considers a  $k$ -mer trusted if it occurs at least twice in the metagenome.

By default, we consider a  $k$ -mer trusted if it occurs at least twice in the accompanying metagenome. The user can adjust this threshold with the parameter `-c`, potentially improving MeCorS's performance for specific data sets.

Figure S2 shows the effect of a parameter sweep for the *E. coli* SAGs and the *in vitro* mock metagenome. Increasing the  $k$ -mer coverage threshold from 1 to 2 is the most beneficial, further increasing this threshold only marginally improves results. Above some coverage threshold error correction performance begins to decline, which we believe to be dependent on the target genome's metagenomic coverage. For the *E. coli* SAGs and the concomitant mock metagenome, this turning point seems to be around 4.

### $k$ -mer size for error correction

The  $k$ -mer size does not depend on e.g. the read length, but on the  $k$ -mer's uniqueness in the (meta)genome. Kelley *et al.*, 2010<sup>12</sup>, suggest a minimum  $k$ -mer size of 15 for bacterial genomes.

Following Li, 2015, MeCorS uses a larger  $k$ -mer size of 31 by default (and currently does not support larger  $k$ -mers).

<sup>12</sup> Kelley, D. R., Schatz, M. C., and Salzberg, S. L. (2010). Quake: quality-aware detection and correction of sequencing errors. *Genome Biol.*, **11**(11), R116

## IDBA-UD assemblies

| Metric                   | Program     | SAG            |                |                |                |                |                |                |                |
|--------------------------|-------------|----------------|----------------|----------------|----------------|----------------|----------------|----------------|----------------|
|                          |             | 0              | 1              | 2              | 3              | 4              | 6              | 7              | 8              |
| NG50                     | raw         | 45284          | 53863          | 31250          | 24834          | 17196          | 87102          | 80574          | 59754          |
|                          | BayesHammer | 40924          | 51004          | 29256          | 24023          | 17246          | <b>95532</b>   | <b>87102</b>   | 44292          |
|                          | MeCorS      | <b>59081</b>   | <b>73496</b>   | <b>54946</b>   | <b>41749</b>   | <b>31569</b>   | 90184          | 80997          | <b>80997</b>   |
| # contigs                | raw         | 330            | 342            | 514            | 607            | 654            | 201            | 200            | 303            |
|                          | BayesHammer | 335            | 345            | 530            | 626            | 653            | <b>191</b>     | <b>194</b>     | 328            |
|                          | MeCorS      | <b>277</b>     | <b>272</b>     | <b>409</b>     | <b>497</b>     | <b>512</b>     | 200            | 198            | <b>249</b>     |
| Largest contig           | raw         | 227106         | 203026         | <b>203098</b>  | 141383         | 102074         | <b>221687</b>  | <b>232585</b>  | 162612         |
|                          | BayesHammer | 203098         | 157125         | 197417         | 141494         | 107872         | <b>221687</b>  | 178322         | 139398         |
|                          | MeCorS      | <b>236473</b>  | <b>203098</b>  | 144213         | <b>141579</b>  | <b>124628</b>  | 221683         | 221683         | <b>236473</b>  |
| Total length             | raw         | 4400079        | 4587934        | 4400469        | 4139052        | 3940625        | 4640153        | <b>4639167</b> | 4533515        |
|                          | BayesHammer | 4402128        | <b>4591089</b> | 4400334        | 4144742        | 3934141        | <b>4641409</b> | 4638005        | <b>4538546</b> |
|                          | MeCorS      | <b>4408926</b> | 4590112        | <b>4421966</b> | <b>4171137</b> | <b>3972787</b> | 4639453        | 4636457        | 4538141        |
| # misassemblies          | raw         | 16             | 11             | 15             | 32             | 36             | <b>0</b>       | <b>0</b>       | 10             |
|                          | BayesHammer | 17             | 11             | 9              | 37             | 37             | <b>0</b>       | <b>0</b>       | 8              |
|                          | MeCorS      | <b>9</b>       | <b>4</b>       | <b>2</b>       | <b>13</b>      | <b>20</b>      | <b>0</b>       | <b>0</b>       | 7              |
| # mismatches per 100 kbp | raw         | <b>4.17</b>    | <b>3.64</b>    | 10.16          | 17.02          | 20.41          | 0.31           | 0.13           | 3.16           |
|                          | BayesHammer | 4.88           | 3.88           | 12.50          | 16.35          | 20.76          | <b>0.15</b>    | <b>0.11</b>    | <b>2.90</b>    |
|                          | MeCorS      | 4.38           | 3.80           | <b>7.93</b>    | <b>8.86</b>    | <b>12.82</b>   | 2.30           | 2.39           | 3.27           |
| # indels per 100 kbp     | raw         | 0.32           | <b>0.24</b>    | 0.69           | 1.47           | 1.09           | 0.13           | <b>0.09</b>    | 0.36           |
|                          | BayesHammer | 0.32           | 0.29           | 0.79           | 1.52           | 1.51           | 0.11           | <b>0.09</b>    | 0.34           |
|                          | MeCorS      | <b>0.25</b>    | 0.31           | <b>0.53</b>    | <b>0.90</b>    | <b>0.85</b>    | <b>0.09</b>    | <b>0.09</b>    | <b>0.18</b>    |
| Genome fraction (%)      | raw         | 93.656         | 97.182         | 93.344         | 87.892         | 83.101         | 98.266         | 98.245         | 96.104         |
|                          | BayesHammer | 93.631         | 97.165         | 93.304         | 87.924         | 82.958         | 98.211         | 98.175         | 96.028         |
|                          | MeCorS      | <b>93.928</b>  | <b>97.431</b>  | <b>93.988</b>  | <b>88.827</b>  | <b>84.053</b>  | <b>98.271</b>  | <b>98.252</b>  | <b>96.265</b>  |
| # genes                  | raw         | 3873           | 4049           | 3741           | 3477           | 3220           | 4186           | 4191           | 4027           |
|                          | BayesHammer | 3859           | 4052           | 3709           | 3469           | 3208           | 4194           | 4199           | 4005           |
|                          | MeCorS      | <b>3931</b>    | <b>4126</b>    | <b>3857</b>    | <b>3593</b>    | <b>3347</b>    | <b>4204</b>    | <b>4202</b>    | <b>4088</b>    |

Table S3: IDBA-UD assembly results. Quality assessment with QUASt.

We assembled all sets of reads with IDBA-UD<sup>13</sup>, version 1.1.2. We modified its source code to increase the maximum allowed read length from 128 to 256 by modifying kMaxShortSequence in src/sequence/short\_sequence.h, as described by the developers.

IDBA-UD expects read pairs interleaved and in Fasta format. For conversion we used IDBA-UD's helper tool fq2fa:

```
for f in Eco*.fastq.1.gz; do
    fq2fa --merge <(zcat $f) <(zcat ${f/.1/.2}) ${f/1.gz/fasta}
done
```

Then, we assembled all read sets with idba\_ud (default settings):

```
for f in Eco*.fasta; do
    echo idba_ud -r $f -o idba_${f%.fasta}
done
```

Lastly, we used QUASt<sup>14</sup>, version 3.1, to evaluate the IDBA-UD assemblies.

<sup>13</sup> Peng, Y. *et al.* (2012). IDBA-UD: a de novo assembler for single-cell and metagenomic sequencing data with highly uneven depth. *Bioinformatics*, 28(11), 1420–1428

<sup>14</sup> Gurevich, A. *et al.* (2013). QUASt: quality assessment tool for genome assemblies. *Bioinformatics*, 29(8), 1072–1075

*SPAdes assemblies*

| Metric                   | Program     | SAG            |                |                |                |                |                |                |                |
|--------------------------|-------------|----------------|----------------|----------------|----------------|----------------|----------------|----------------|----------------|
|                          |             | 0              | 1              | 2              | 3              | 4              | 6              | 7              | 8              |
| NG50                     | raw         | 65444          | 95218          | 66287          | 48903          | 26823          | 114661         | 117715         | 86966          |
|                          | BayesHammer | <b>86625</b>   | 95218          | 67436          | 52817          | 31448          | <b>120770</b>  | <b>132608</b>  | 105995         |
|                          | MeCorS      | <b>86625</b>   | <b>95517</b>   | <b>72055</b>   | <b>53947</b>   | <b>36236</b>   | 112350         | <b>132608</b>  | <b>112853</b>  |
| # contigs                | raw         | 447            | 400            | 606            | 718            | 813            | 245            | 233            | 324            |
|                          | BayesHammer | 302            | <b>275</b>     | 474            | 594            | 676            | <b>198</b>     | <b>185</b>     | <b>250</b>     |
|                          | MeCorS      | <b>288</b>     | 279            | <b>418</b>     | <b>534</b>     | <b>569</b>     | 210            | 213            | 263            |
| Largest contig           | raw         | 203603         | <b>224667</b>  | <b>218793</b>  | <b>178300</b>  | 113773         | 269308         | 268816         | 223154         |
|                          | BayesHammer | <b>204882</b>  | 203257         | <b>218793</b>  | 167410         | 135551         | <b>312119</b>  | 269348         | <b>269318</b>  |
|                          | MeCorS      | 203394         | 224320         | <b>218793</b>  | 178231         | <b>155221</b>  | 268535         | <b>312008</b>  | 268327         |
| Total length             | raw         | <b>4522153</b> | <b>4703061</b> | <b>4533214</b> | <b>4290463</b> | <b>4138591</b> | <b>4713277</b> | <b>4718163</b> | <b>4633297</b> |
|                          | BayesHammer | 4443696        | 4633876        | 4464269        | 4233011        | 4046113        | 4686582        | 4689565        | 4584513        |
|                          | MeCorS      | 4452849        | 4645907        | 4471868        | 4240428        | 4065827        | 4698390        | 4702810        | 4600454        |
| # misassemblies          | raw         | 15             | <b>2</b>       | 22             | 45             | 51             | <b>1</b>       | 3              | 12             |
|                          | BayesHammer | 11             | 7              | 19             | 31             | 38             | <b>1</b>       | 2              | 7              |
|                          | MeCorS      | <b>6</b>       | 3              | <b>10</b>      | <b>23</b>      | <b>22</b>      | <b>1</b>       | <b>0</b>       | <b>6</b>       |
| # mismatches per 100 kbp | raw         | 15.30          | 11.57          | 34.70          | 48.21          | 50.53          | 2.84           | <b>2.14</b>    | 9.72           |
|                          | BayesHammer | 12.70          | 10.30          | 30.34          | 40.41          | 48.42          | <b>1.27</b>    | 2.17           | <b>7.66</b>    |
|                          | MeCorS      | <b>10.41</b>   | <b>9.32</b>    | <b>22.69</b>   | <b>30.86</b>   | <b>36.47</b>   | 5.66           | 5.21           | 8.43           |
| # indels per 100 kbp     | raw         | 0.89           | 1.17           | 2.26           | 4.48           | 4.24           | 0.31           | <b>0.22</b>    | 1.00           |
|                          | BayesHammer | 1.17           | 1.19           | 3.16           | 3.48           | 4.58           | <b>0.24</b>    | 0.35           | 0.94           |
|                          | MeCorS      | <b>0.64</b>    | <b>0.95</b>    | <b>2.24</b>    | <b>3.30</b>    | <b>3.28</b>    | 0.55           | 0.31           | <b>0.83</b>    |
| Genome fraction (%)      | raw         | <b>94.241</b>  | <b>97.948</b>  | <b>94.239</b>  | 89.098         | 84.372         | <b>98.665</b>  | <b>98.708</b>  | <b>96.702</b>  |
|                          | BayesHammer | 94.050         | 97.527         | 93.984         | 89.133         | 84.220         | 98.505         | 98.446         | 96.459         |
|                          | MeCorS      | 94.223         | 97.629         | 94.223         | <b>89.543</b>  | <b>84.798</b>  | 98.580         | 98.541         | 96.603         |
| # genes                  | raw         | 3876           | 4117           | 3782           | 3532           | 3281           | 4217           | <b>4224</b>    | 4081           |
|                          | BayesHammer | 3898           | 4124           | 3805           | 3562           | 3300           | 4211           | 4219           | 4093           |
|                          | MeCorS      | <b>3937</b>    | <b>4133</b>    | <b>3866</b>    | <b>3608</b>    | <b>3390</b>    | <b>4218</b>    | 4220           | <b>4097</b>    |

Table S4: **SPAdes assembly results.**  
Quality assessment with QUAST.

We assembled all read sets with SPAdes, version 3.6.0:

```
for f in Eco*.fastq.1.gz; do
    spades.py --sc --only-assembler --careful -k 21,33,55,77 \
    -1 $f -2 ${f/.1/.2} -o spades_${f%.fastq.1.gz}
done
```

The parameter `--careful` minimizes the number of mismatches in the final contigs. We empirically selected `-k 21,33,55,77` to account for longer SAG sequencing reads. Iterating over these four  $k$ -mer sizes generated assemblies of higher contiguity than the default settings of `-k 21,33,55`, while maintaining a high accuracy.

We used QUAST again to evaluate the SPAdes assemblies. While there are subtle differences between the IDBA-UD and SPAdes assemblies, both results demonstrate the large potential of metagenome-enabled error correction.



### Running MeCorS multithreaded

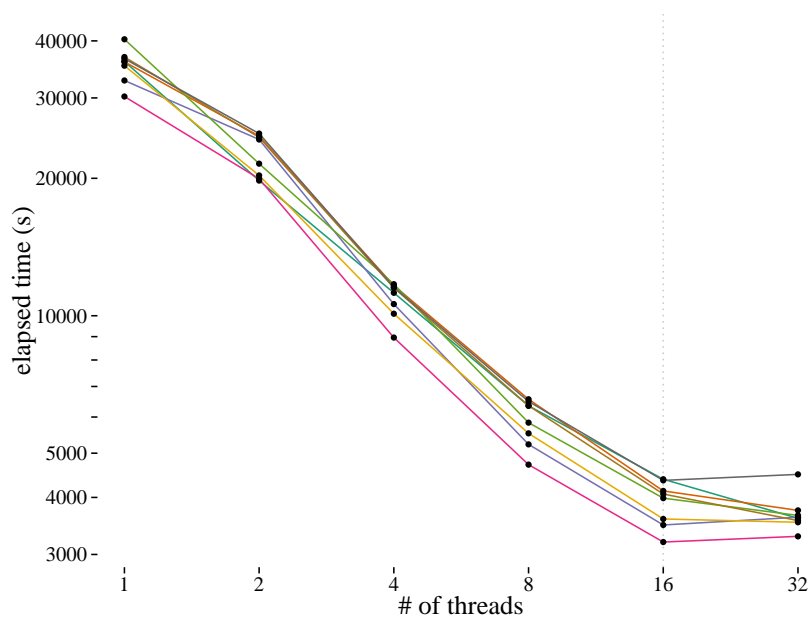

Figure S3: Efficiency of threading. MeCorS defaults to using 16 threads.

MeCorS uses the same multithreading strategy as e.g. bwa (and re-uses chunks of Heng Li's source code, released under the MIT license). Briefly, MeCorS first reads a batch of  $N$  sequencing reads containing  $B$  bases, and then processes these in  $t$  threads.

On our systems, we seem to run into an I/O bottleneck using 16 threads and a batch size of 100 Mbp. Increasing the batch size and/or the number of threads did not speed up computation, therefore we picked these as defaults. The parameters `-B` and `-t` allow the user to adjust these settings.

## References

- Bankevich, A. *et al.* (2012). SPAdes: a new genome assembly algorithm and its applications to single-cell sequencing. *J. Comput. Biol.*, **19**(5), 455–477.
- Bowers, R. M. *et al.* (2015). Impact of library preparation protocols and template quantity on the metagenomic reconstruction of a mock microbial community. *BMC Genomics*, **16**(1), 856.
- Clingenpeel, S. *et al.* (2014a). Effects of sample treatments on genome recovery via single-cell genomics. *ISME J*, **8**(12), 2546–2549.
- Clingenpeel, S. *et al.* (2014b). Reconstructing each cell’s genome within complex microbial communities—dream or reality? *Front Microbiol*, **5**, 771.
- Gurevich, A. *et al.* (2013). QUAST: quality assessment tool for genome assemblies. *Bioinformatics*, **29**(8), 1072–1075.
- Kelley, D. R., Schatz, M. C., and Salzberg, S. L. (2010). Quake: quality-aware detection and correction of sequencing errors. *Genome Biol.*, **11**(11), R116.
- Lasken, R. S. and Stockwell, T. B. (2007). Mechanism of chimera formation during the Multiple Displacement Amplification reaction. *BMC Biotechnol.*, **7**, 19.
- Li, H. (2013). Aligning sequence reads, clone sequences and assembly contigs with BWA-MEM. *arXiv:1303.3997*.
- Li, H. (2015). BFC: correcting Illumina sequencing errors. *Bioinformatics*, **31**(17), 2885–2887.
- Li, H. and Durbin, R. (2010). Fast and accurate long-read alignment with Burrows-Wheeler transform. *Bioinformatics*, **26**(5), 589–595.
- Li, H. *et al.* (2009). The Sequence Alignment/Map format and SAMtools. *Bioinformatics*, **25**(16), 2078–2079.
- Nikolenko, S. I. *et al.* (2013). BayesHammer: Bayesian clustering for error correction in single-cell sequencing. *BMC Genomics*, **14 Suppl 1**, S7.
- Peng, Y. *et al.* (2012). IDBA-UD: a de novo assembler for single-cell and metagenomic sequencing data with highly uneven depth. *Bioinformatics*, **28**(11), 1420–1428.
